# Supplementary material
Source: Springer Nature journal article supplement (https://www.springermedizin.de/resource/supplementary/12890_2013_544_MOESM3_ESM.pdf/9505278)

# Femoral Venous

COPD vs. All groups,  $P < 0.05$

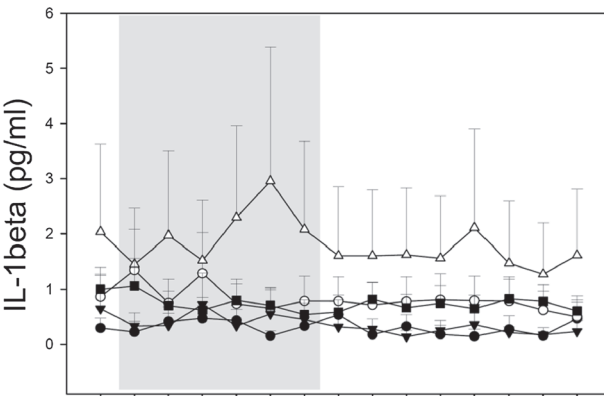

COPD vs. AATD+Aug,  $P < 0.05$   
 COPD vs. AATD-Aug,  $P < 0.05$   
 COPD vs. AATD PFTnorm,  $P < 0.05$   
 Healthy vs. AATD PFTnorm,  $P < 0.05$

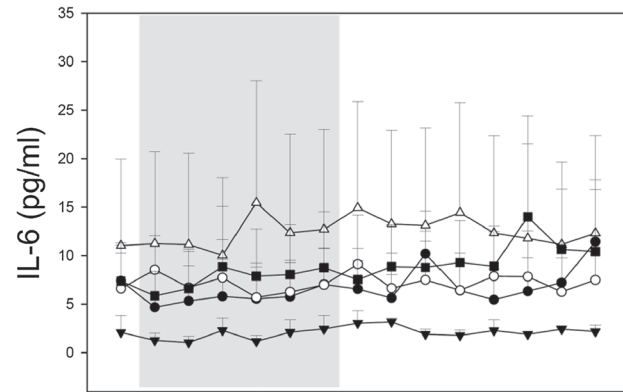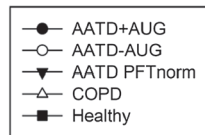

COPD vs. All groups,  $P < 0.05$   
 AATD+Aug vs. AATD-Aug,  $P < 0.05$   
 Healthy vs. AATD-Aug,  $P < 0.05$   
 Healthy vs. AATD PFTnorm,  $P < 0.05$

COPD vs. All groups,  $P < 0.05$   
 Healthy vs. AATD+Aug,  $P < 0.05$   
 Healthy vs. AATD-Aug,  $P < 0.05$   
 AATD PFTnorm vs. AATD+Aug,  $P < 0.05$   
 AATD PFTnorm vs. AATD-Aug,  $P < 0.05$

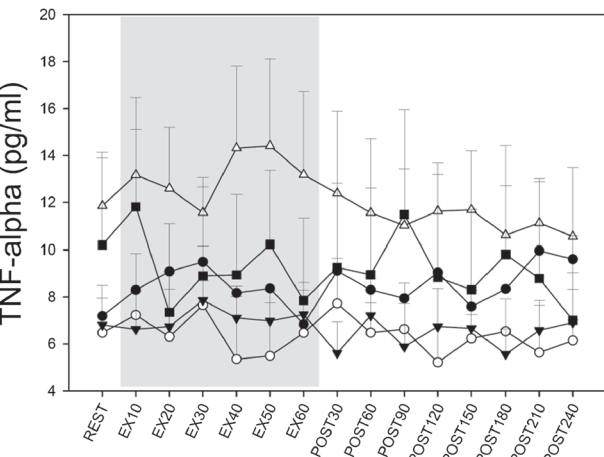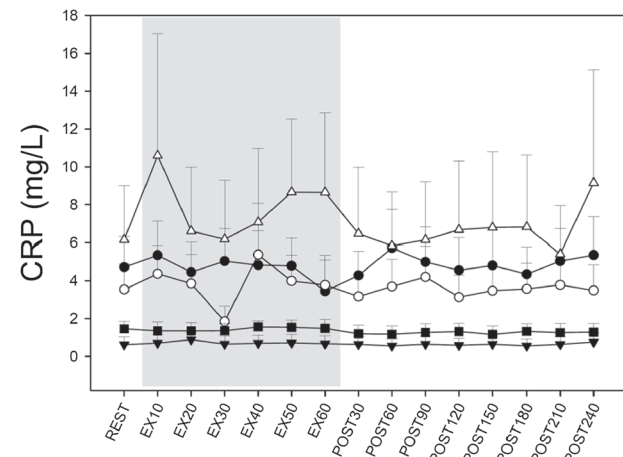

Supplement: MOESM3 [file 9505278]
